# Supplementary material
Source: HighWire-hosted journal article supplement (http://bmjopenquality.bmj.com/highwire/filestream/136236/field_highwire_adjunct_files/0/ds6708.docx)

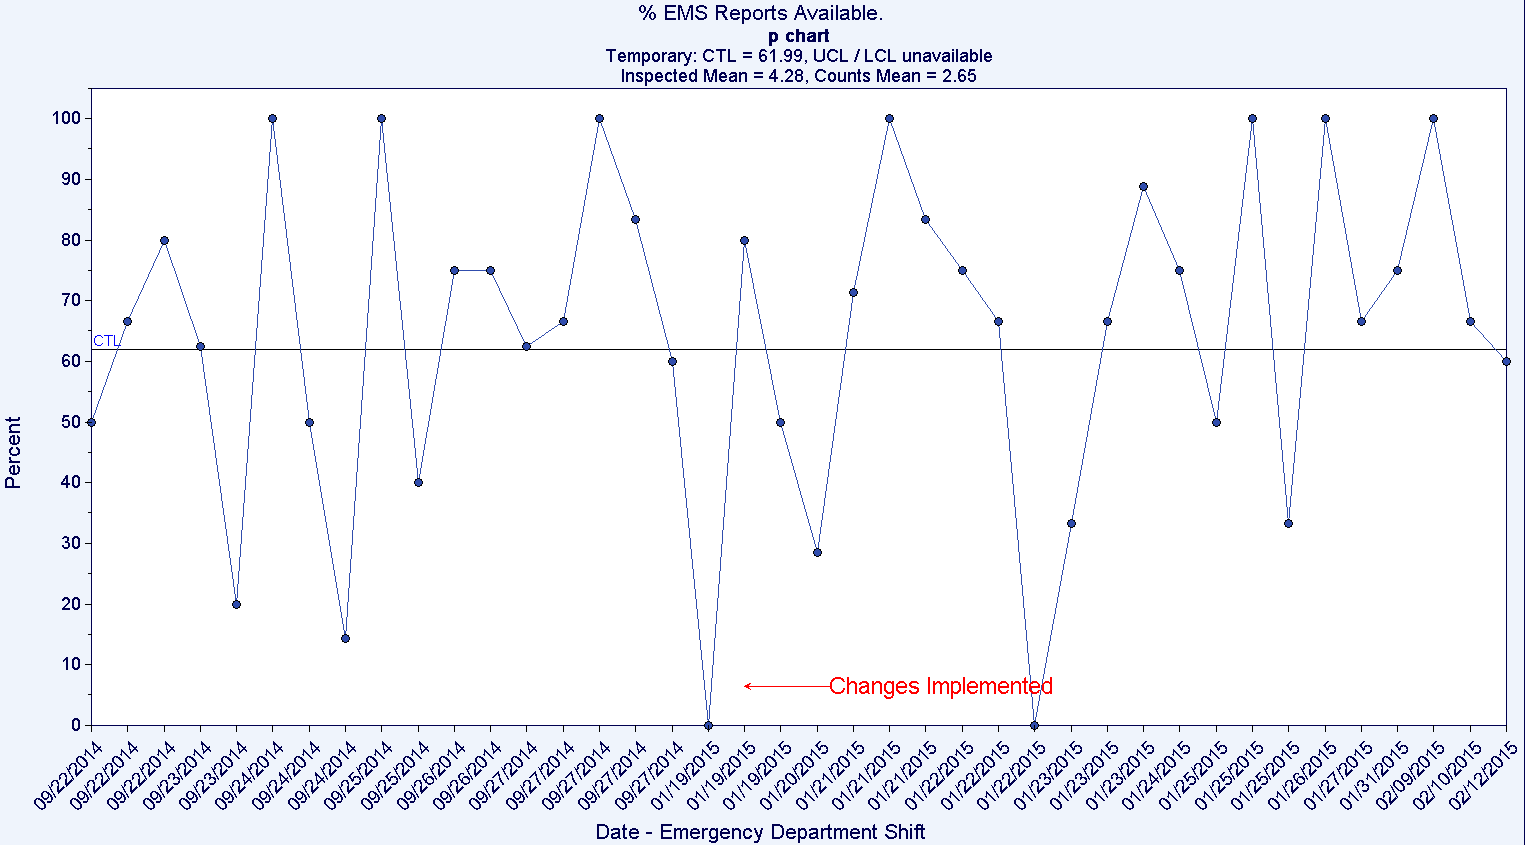


Figure 1


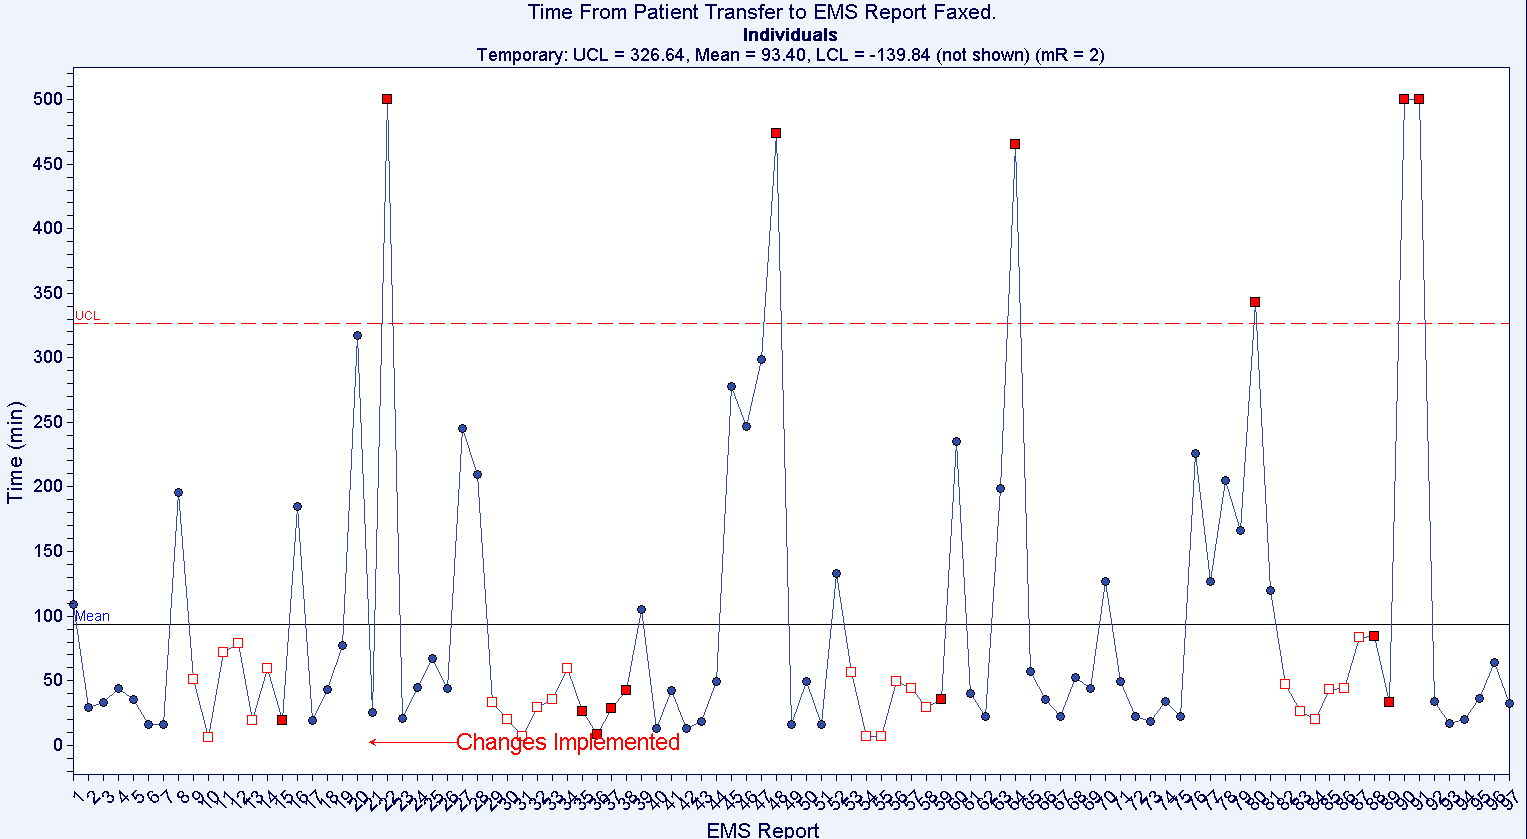


Figure 2


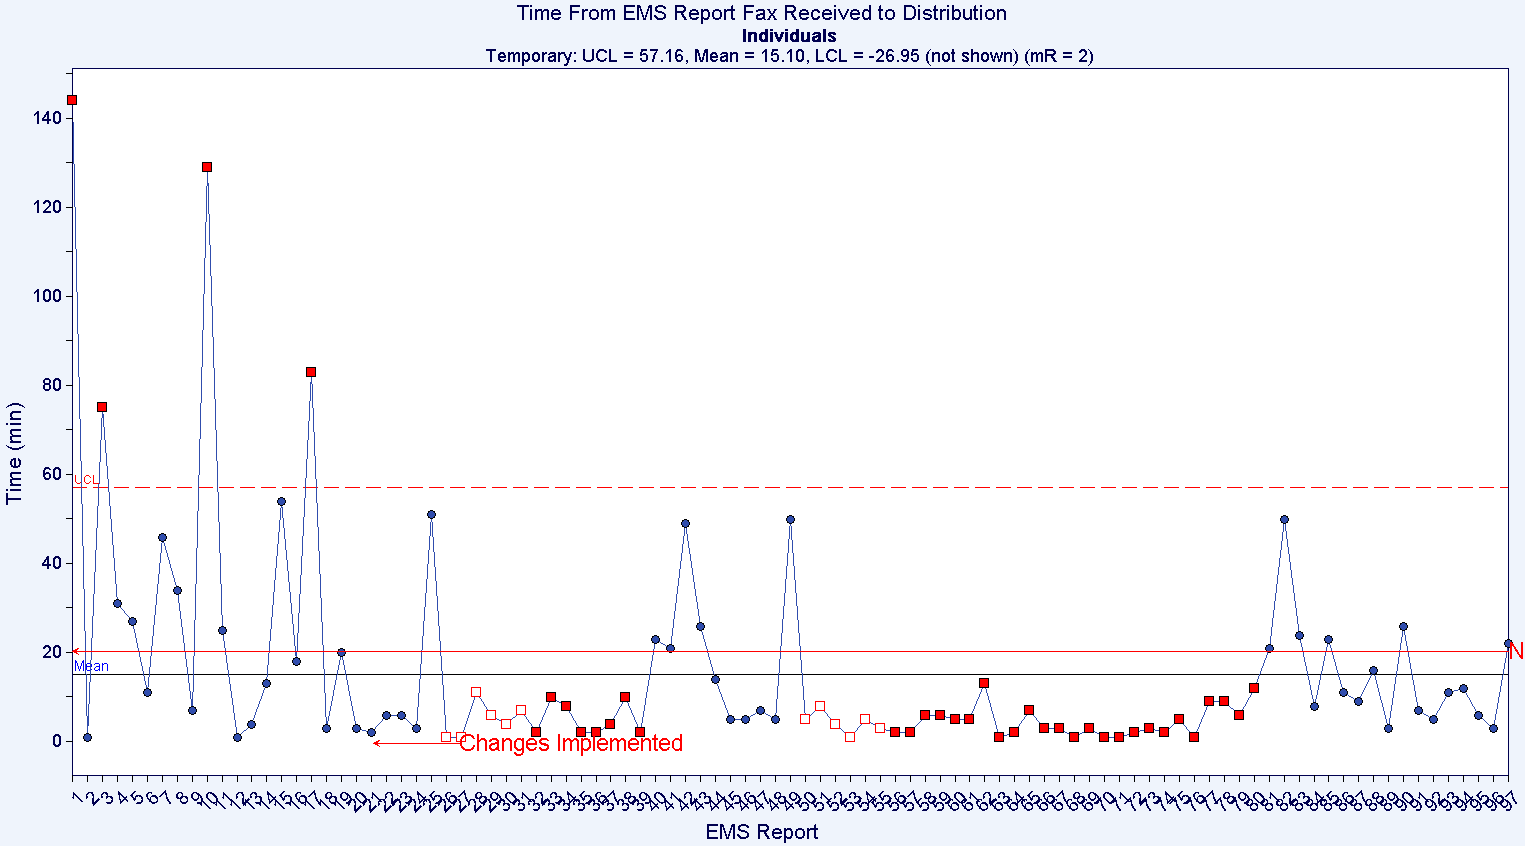


Figure 3

Supplement: ds6708.docx [file ds6708.docx]
